# Supplementary material for: In Silico Analysis of the Minor Histocompatibility Antigen Landscape Based on the 1000 Genomes Project
Source: Front Immunol. 2018 Aug 16;9:1819. doi: 10.3389/fimmu.2018.01819 (PMC6105694; doi:10.3389/fimmu.2018.01819)
Supplement: Supplementary file 5 [file table_5.xlsx]

## Sheet: known 9-mer MiHA
miha_name	pept_imm	pept_non	hla_allele	gene_name	snp	reason	in URP	rank	pvalue	in silico MHC-binder	in MS dataset
HA-3	VTEPGTAQY	VMEPGTAQY	HLA-A*01:01	AKAP13	rs2061821	nsSNP	in URP	0.02	0.0002	SB	not in MS
HA-1/A2	VLHDDLLEA	VLRDDLLEA	HLA-A*02:01	HMHA1	rs1801284	nsSNP	in URP	0.5	0.004	SB	not in MS
HA-2	YIGEVLVSV	YIGEVLVSM	HLA-A*02:01	MYO1G	rs61739531	nsSNP	in URP	0.03	0.003	SB	in MS
HA-8	RTLDKVLEV	PTLDKVLEV	HLA-A*02:01	PUM3	rs2173904	nsSNP	in URP	0.7	0.004	WB	not in MS
LB-SSR1-1S	SLAVAQDLT	LLAVAQDLT	HLA-A*02:01	SSR1	rs10004	nsSNP	in URP	11	0.27	not binder	not in MS
TRIM22	AVPPCCIGV	AVPPCRIGV	HLA-A*02:01	TRIM22	rs187416296	nsSNP	in URP	2.5	0.03	not binder	not in MS
UTA2-1	QLLNSVLTL	QLPNSVLTL	HLA-A*02:01	KIAA1551	rs2166807	nsSNP	in URP	0.5	0.002	SB	not in MS
LB-CLYBL-1Y	SLAAYIPRL	SLAADIPRL	HLA-A*02:01	CLYBL	rs17577293	nsSNP	in URP	0.06	0.0007	SB	not in MS
LB-HIVEP1-1S	SLPKHSVTI	SLPKHNVTI	HLA-A*02:01	HIVEP1	rs2228220	nsSNP	in URP	3	0.02	not binder	not in MS
LB-NISCH-1A	ALAPAPAEV	ALAPAPVEV	HLA-A*02:01	NISCH	rs887515	nsSNP	in URP	0.15	0.002	SB	in MS
LB-CCL4-1T	CADPSETWV	CADPSESWV	HLA-A*02:01	CCL4	rs1719152	nsSNP	in URP	10	0.2	not binder	not in MS
LB-NCAPD3-1Q	WLQGVVPVV	WLRGVVPVV	HLA-A*02:01	NCAPD3	rs12292394	nsSNP	in URP	0.15	0.02	WB	not in MS
LB-NDC80-1A	HLEEQIAKV	NULL	HLA-A*02:01	NDC80	rs9051	nsSNP	in URP	1.8	0.005	WB	in MS
LB-NDC80-1P	HLEEQIPKV	NULL	HLA-A*02:01	NDC80	rs9051	nsSNP	in URP	0.9	0.007	WB	not in MS
ACC-1Y	DYLQYVLQI	NULL	HLA-A*24:02	BCL2A1	rs1138357	nsSNP	in URP	0.3	0.004	SB	not in MS
ACC-1C	DYLQCVLQI	NULL	HLA-A*24:02	BCL2A1	rs1138357	nsSNP	in URP	0.5	0.004	SB	not in MS
LB-GEMIN4-1V	FPALRFVEV	FPALRFVEE	HLA-B*07:02	GEMIN4	rs4968104	nsSNP	in URP	0.4	0.02	WB	in MS
LB-FUCA2-1V	RLRQVGSWL	RLRQMGSWL	HLA-B*07:02	FUCA2	rs3762002	nsSNP	in URP	0.25	0.02	WB	not in MS
HEATR1	ISKERAEAL	ISKERAGAL	HLA-B*08:01	HEATR1	rs2275687	nsSNP	in URP	0.5	0.0002	SB	not in MS
LB-GSTP1-1V	DLRCKYVSL	DLRCKYISL	HLA-B*08:01	GSTP1	rs1695	nsSNP	in URP	0.01	0.0001	SB	not in MS
LB-GEMIN4-2V	FPALRFVEV	FPALRFVEE	HLA-B*08:01	GEMIN4	rs4968104	nsSNP	in URP	0.03	0.007	SB	in MS
LB-GLE1-1V	GQVRLRALY	GQIRLRALY	HLA-B*15:01	GLE1	rs2275260	nsSNP	in URP	0.4	0.005	SB	not in MS
DPH1	SVLPEVDVW	SLLPEVDVW	HLA-B*57:01	DPH1	rs35394823	nsSNP	in URP	0.25	0.004	SB	not in MS
HER2/NEU	ATLERPKTL	NULL	HLA-A*02:01	ERBB2	rs1058808	nsSNP	in URP	18	0.02	not binder	not in MS
LRH-1	TPNQRQNVC	NULL	HLA-B*07:02	P2RX5	rs3215407	frameshift	in URP	1.4	0.02	WB	not in MS
P2RX7	WFHHCHPKY	WFHHCRPKY	HLA-A*29:02	P2RX7	rs7958311	nsSNP	in URP	0.17	0.002	SB	not in MS
ACC-4	ATLPLLCAR	ATLPLLCAG	HLA-A*31:01	CTSH	rs2289702	nsSNP	in URP	0.07	0.0005	SB	not in MS
LB-NUP133-1R	SEDLILCRL	SEDLILCQL	HLA-B*40:01	NUP133	rs1065674	nsSNP	in URP	0.17	0.002	SB	not in MS
LB-SON-1R	SETKQRTVL	SETKQCTVL	HLA-B*40:01	SON	rs13047599	nsSNP	in URP	0.3	0.0003	SB	in MS
LB-SWAP70-1Q	MEQLEQLEL	MEQLEELEL	HLA-B*40:01	SWAP70	rs415895	nsSNP	in URP	0.12	0.003	SB	not in MS
LB-TRIP10-1EPC	GEPQDLCTL	GGSQDLGTL	HLA-B*40:01	TRIP10	rs1049229; rs1049230; rs1049232	nsSNP	in URP	0.4	0.003	SB	not in MS
LB-C19ORF48-2E	TAWPGAPEV	TAWPGAPGV	HLA-B*51:01	C19ORF48	rs4801853	nsSNP	in URP	0.12	0.0008	SB	not in MS
UGT2B17/A2	CVATMIFMI	NULL	HLA-A*02:06	UGT2B17	NULL	gene deletion	not in URP	-	-		not in MS
LB-ARHGDIB-1R	LPRACWREA	LPRACWPEA	HLA-B*07:02	ARHGDIB	rs4703	alternative frame	not in URP	-	-		not in MS
LB-MOB3A-1C	CPRPGTWTC	SPRPGTWTC	HLA-B*07:02	MOB3A	rs11541046	alternative frame	not in URP	-	-		not in MS
